# Supplementary material for: Drosophila insulin-like peptide 1 (DILP1) is transiently expressed during non-feeding stages and reproductive dormancy
Source: PubMed Central journal article supplement (PMC4873736; doi:10.1038/srep26620), 2016-05-20
Supplement: srep26620-s1.pdf [file srep26620-s1.pdf]

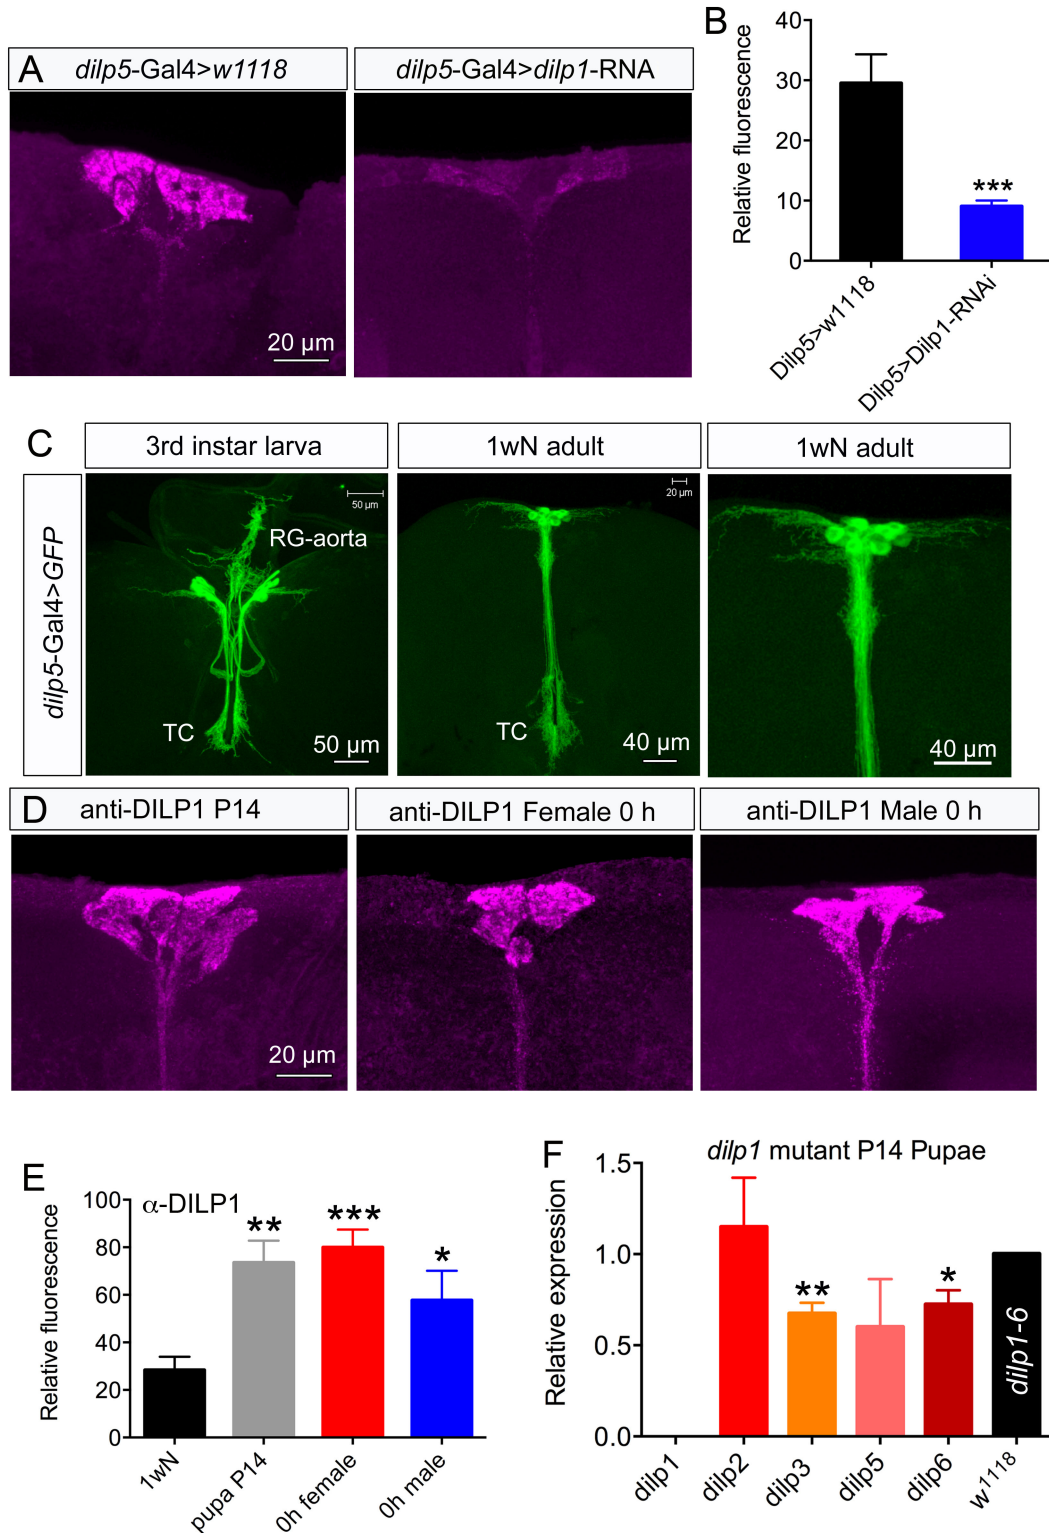

**Fig. S2.** Expression of DILP1/*dilp1* in pupae and early male and female adults. **A-B.** DILP1 immunolabeling diminishes after *dilp1*-RNAi with a *dilp5*-Gal4 driver compared to control (*dilp5*-Gal4>*w1118*). Data are presented as means  $\pm$  S.E.M,  $n = 6-8$  flies for each genotype from three crosses (\*\*\*) $p < 0.001$ , as assessed by unpaired Students' *t*-test). **C.** The *dilp5*-Gal4 drives GFP in IPCs of third instar larva and adults (1 week old flies shown). Note axon terminations in ring gland and aorta (RG-aorta) and branches in tritocerebrum (TC). **D.** DILP1 immunolabeling in late pupa (P14) and newly-eclosed (0 h) female and male flies. **E.** Quantification of DILP1 immunofluorescence in one-week-

old flies (1wN), late pupae (P14) and newly-eclosed flies (0h). Data are presented as means  $\pm$  S.E.M,  $n = 6-8$  flies from three replicates (\* $p < 0.05$ , \*\* $p < 0.01$ , \*\*\* $p < 0.001$ , as assessed by unpaired Students' t-test). **F.** Expression of *dilp* mRNAs in *dilp1* mutant pupae (stage P14). The black bar represents control levels (set to 1.0) of *dilp1*, 2, 3, 5, and 6 in *w<sup>1118</sup>* pupae. Only *dilp3* and *dilp6* levels diminished significantly. Data are presented as means  $\pm$  S.E.M,  $n = 3$  independent replicates with 15- 20 pupae in each replicates for each genotype (\* $p < 0.05$ , \*\* $p < 0.01$ , as assessed by unpaired Students' t-test).

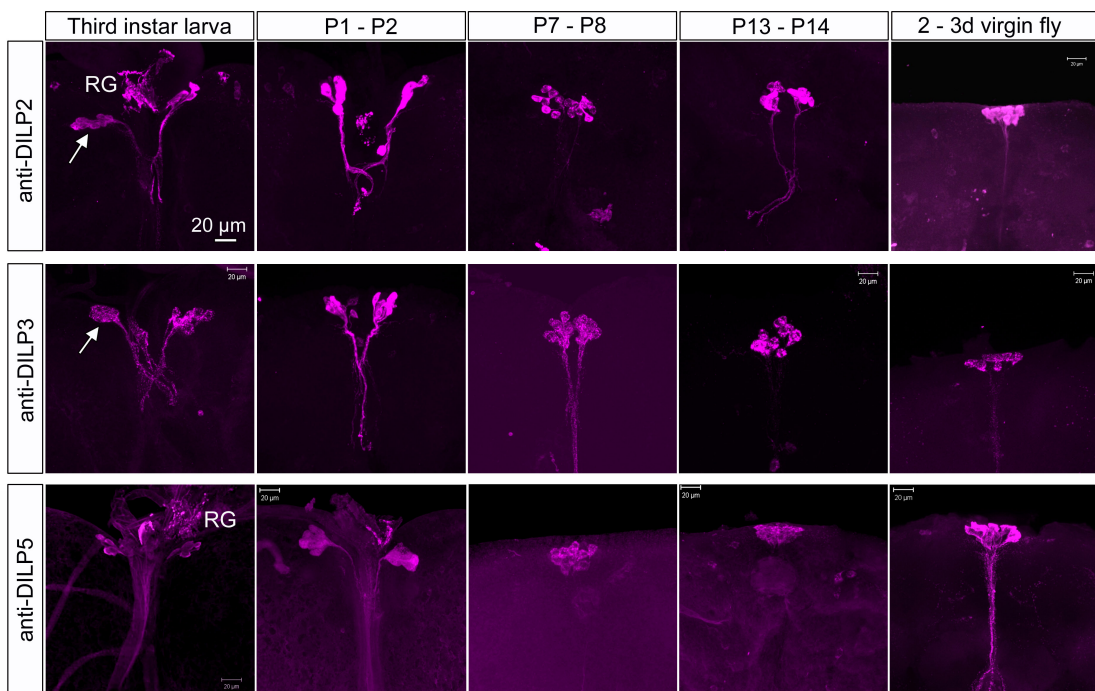

**Fig. S3.** Expression of DILP2, 3 and 5 immunolabeling during development. DILP2, 3 and 5 immunolabeling can be seen in larvae as well as all stages of the pupa and in 2-3d old adult. In published accounts it is well known that DILP2, 3 and 5 immunolabeling remain high also in older flies.

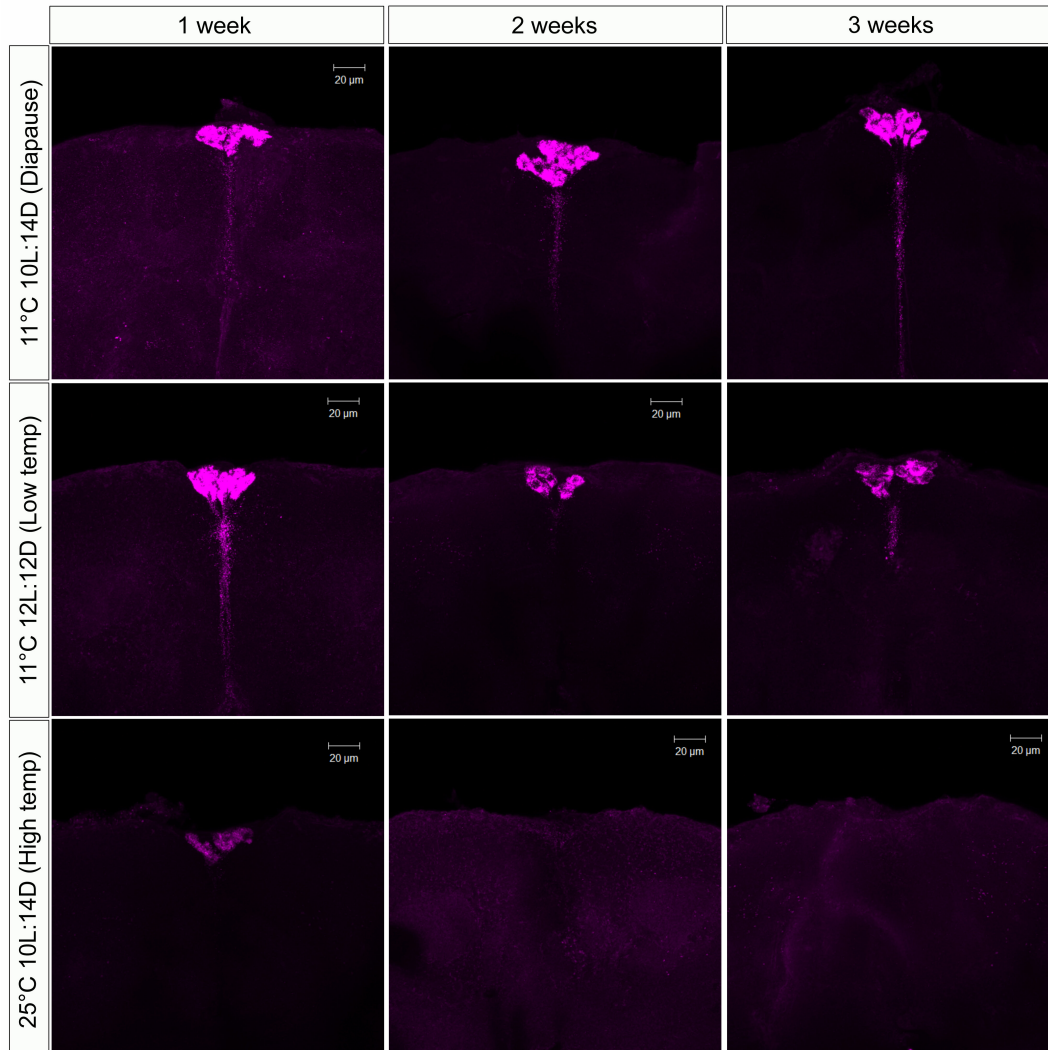

**Fig. S4.** DILP1 expression in IPCs is affected by low temperature, but not short photoperiod. Comparison of DILP1 immunolabeling in IPCs exposed to 11°C and 10L:14D (diapause conditions), 11°C and 12L:12D (low temp), and 25°C and 10L:14D (high temp) for 1 - 3 weeks. Accompanying quantification graph in Fig. 3G.

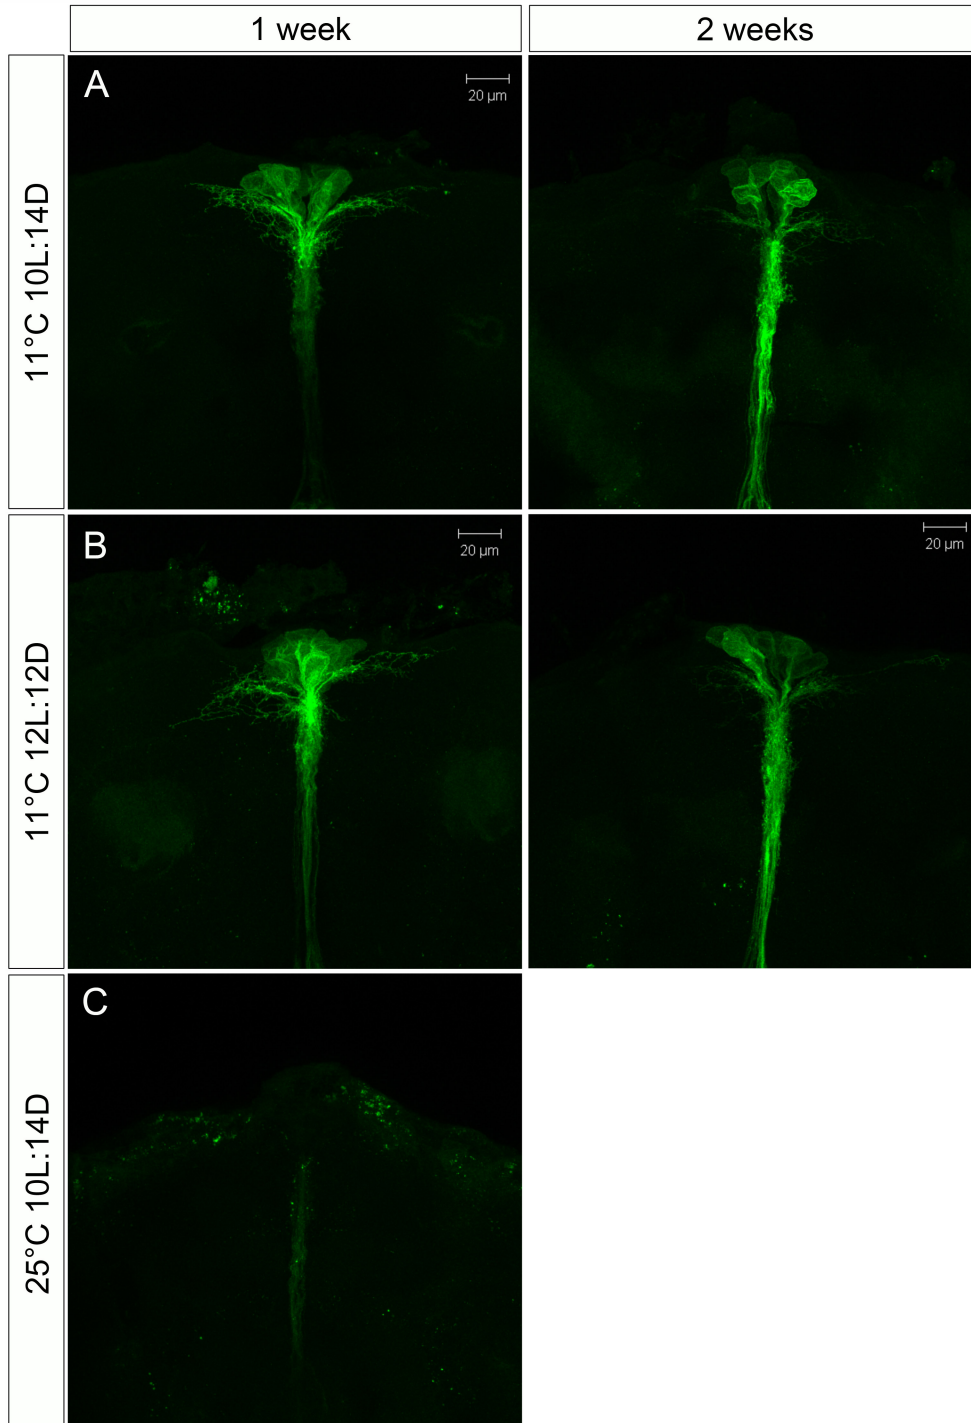

**Fig. S5.** The *dilp1*-GFP expression in IPCs is affected by low temperature, but not short photoperiod. Comparison of *dilp1*-GFP expression in IPCs exposed to 11°C and 10L:14D (diapause conditions), 11°C and 12L:12D, and 25°C and 10L:14D for 1 - 2 weeks (3 weeks exposure are shown in Fig. 3 I, J). Accompanying quantification graph in Fig. 3H.

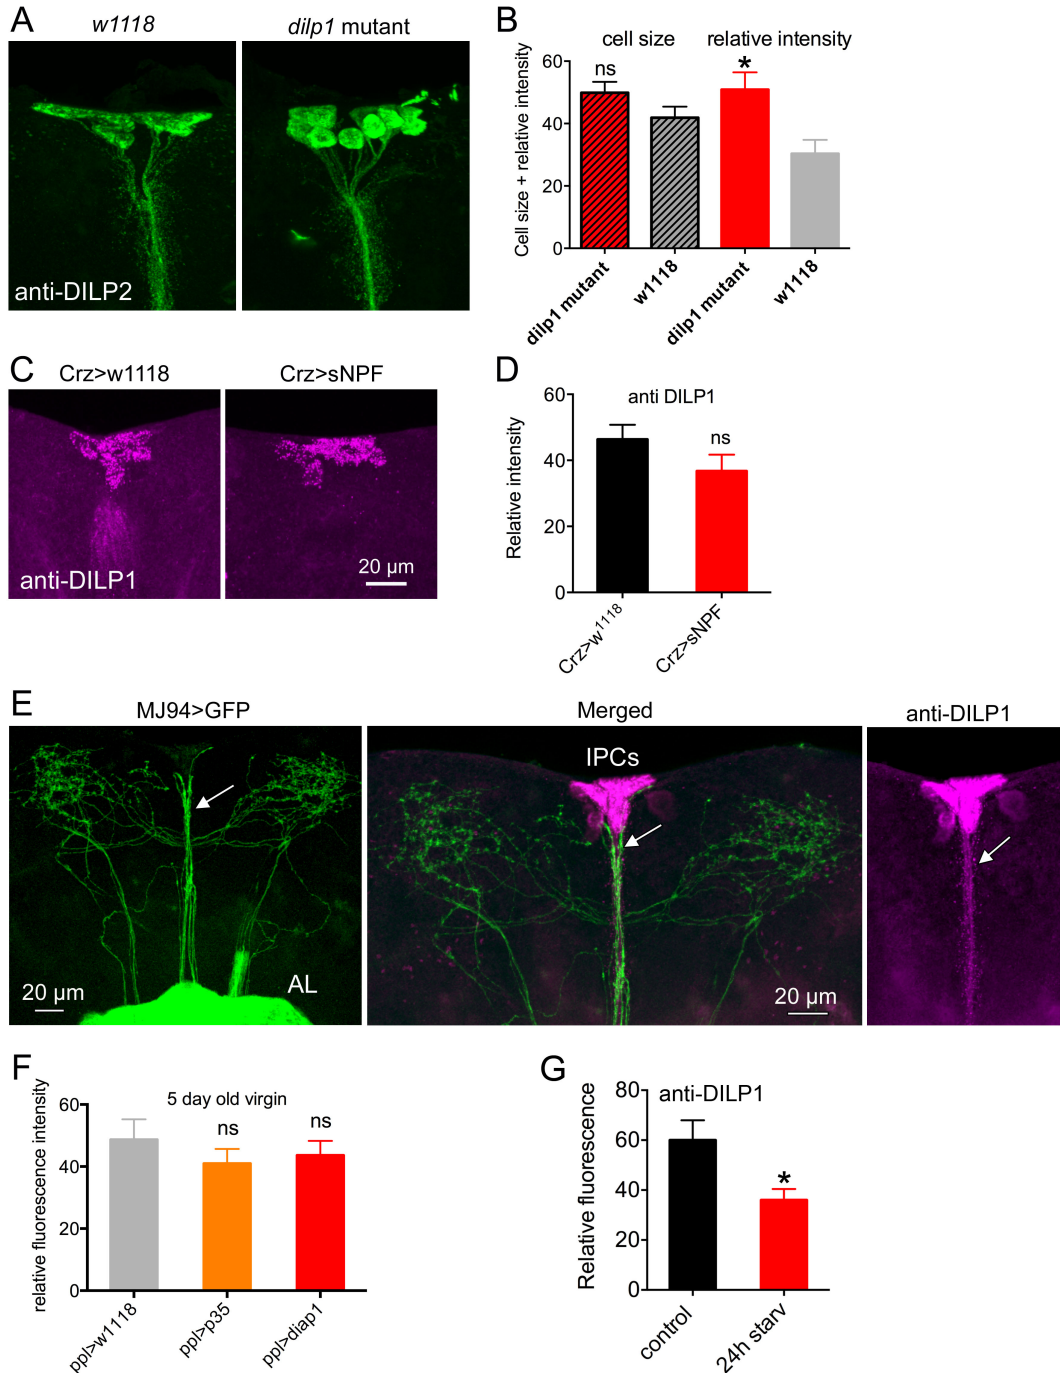

**Fig. S6.** Manipulations of DILP1 and DILP2 levels and lack of effects. **A-B.** In *dilp1* mutant flies the intensity of DILP2 immunolabeling in IPCs is increased, but the size of the IPC cell bodies is not affected. Data are presented as means  $\pm$  S.E.M,  $n = 6-8$  flies for each genotype from three replicates (\* $p < 0.05$ , ns - not significant, as assessed by unpaired Students' t test). **C-D.** Targeted over-expression of sNPF in corazonin-producing neurons (*Crz>sNPF*) has no effect on DILP1 immunolabeling. Data are presented as means  $\pm$  S.E.M,  $n = 8-9$  flies for each genotype from three crosses (ns - not significant, as assessed by unpaired Students' t-test). **E.** The MJ94-Gal4 expressing neurons are sensory neurons (including olfactory and gustatory neurons), some of which impinge on the DILP1 immunoreactive IPCs along the brain mid-line (arrow). The antennal lobe (AL) is massively labeled by MJ94-GFP. **F.** Using the pumpless (*ppl*) Gal4 driver to express *p35* and *diap1* has no effect

on DILP1 immunolevels in 5-day-old virgin flies (in contrast to the *Lsp1-Gal4* driver shown in Fig. 5I-J). Data are presented as means  $\pm$  S.E.M,  $n = 10-11$  flies for each genotype from three crosses (ns - not significant, as assessed by unpaired Students' *t*-test). **G.** DILP1 fluorescence is decreased after 24 h starvation in newly-eclosed virgin Canton S flies. Data are presented as means  $\pm$  S.E.M,  $n = 8-10$  flies from three replicates (\* $p < 0.05$ , as assessed by unpaired Students' *t*-test).

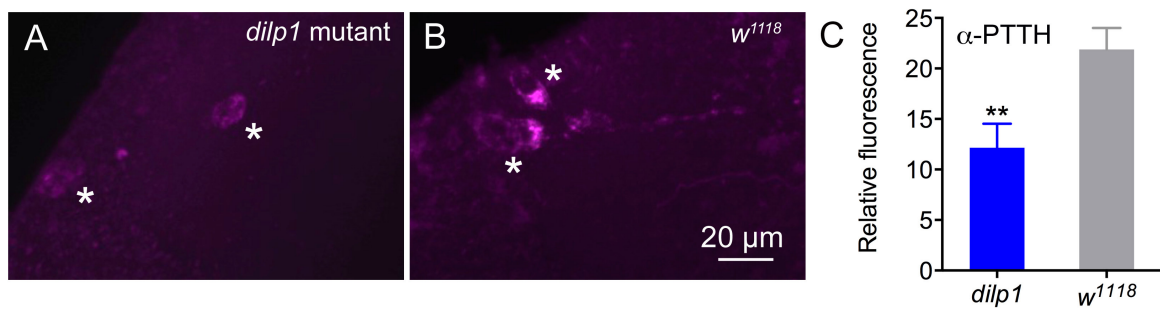

**S. Fig. 7.** The level of the neuropeptide PTTH decreases in 1 to 3 h old *dilp1* mutant flies. **A-B.** PTTH immunolabeling in lateral neurons of the brain is weaker in *dilp1* mutant flies (**A**), than in *w<sup>1118</sup>* controls (**B**). **C.** Quantification of PTTH immunofluorescence. Data are presented as means  $\pm$  S.E.M,  $n = 13$  for *dilp1* mutant and  $n = 12$  for *w<sup>1118</sup>* (\*\* $p < 0.01$ , as assessed by unpaired Students' *t*-test).

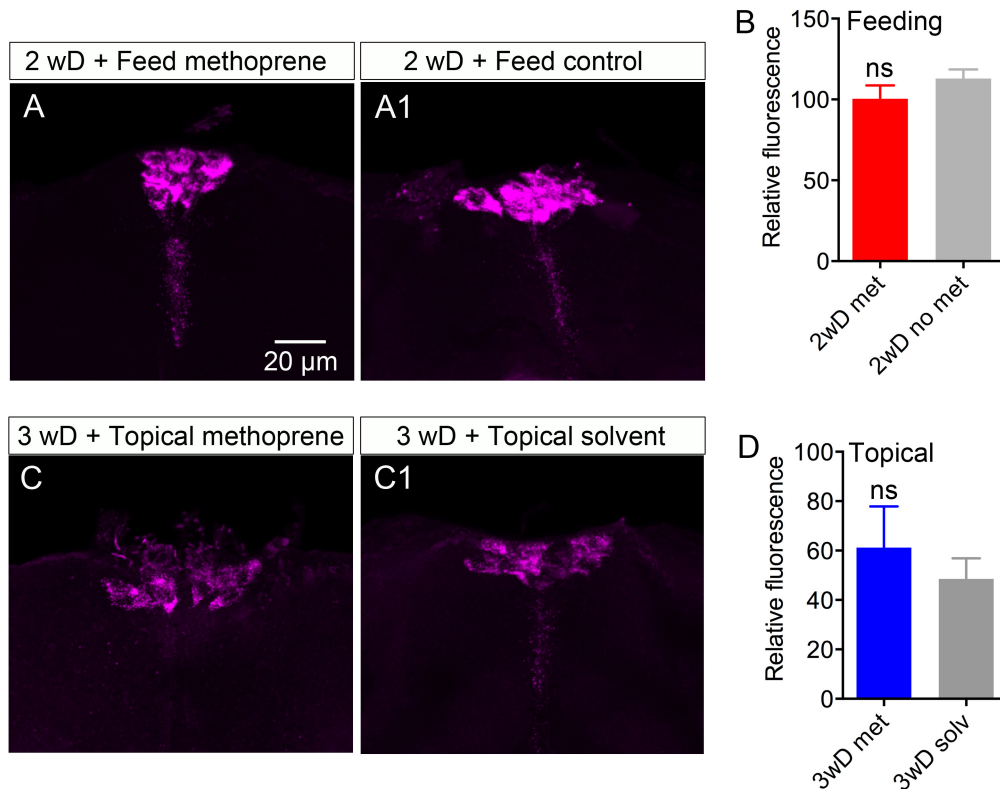

**Fig. S8.** Methoprene treatment does not affect DILP1 expression in IPCs. **A** and **B**. Feeding the JH analog methoprene for two weeks to diapausing flies (2wD) does not affect DILP1 immunolabeling. **C** and **D**. Topical application of methoprene to abdomens of 3-week diapausing flies (3wD) has no effect. Data are presented as means  $\pm$  S.E.M,  $n = 5-7$  flies from three replicates (ns – not significant, as assessed by unpaired Students'  $t$ -test).
